# Supplementary material for: Chiral Binaphthol Fluorescent Materials Based on a Novel Click Reaction
Source: MDPI journal article supplement (doi:10.3390/sym15030629), 2023-03-02
Supplement: s1 [file s1]

# Supporting Information

## Chiral Binaphthol Fluorescent Materials Based on a Novel Click Reaction

Fuchong Li <sup>1</sup>, Wei Liu <sup>2</sup>, Li Tian <sup>1</sup>, Wei Cao <sup>2</sup>, Xu Li <sup>3</sup>, Junhong Guo <sup>1</sup>, Jinfeng Cui <sup>1</sup> and Baoping Yang <sup>1,\*</sup>

<sup>1</sup> School of Petrochemical Engineering, Lanzhou University of Technology, Lanzhou 730050, China

<sup>2</sup> Key Laboratory of Special Function Materials and Structure Design, Institute of National Nuclear Industry, Frontiers Science Center for Rare Isotope, School of Nuclear Science and Technology, Ministry of Education, Lanzhou University, Lanzhou 730000, China

<sup>3</sup> The College of Chemistry and Chemical Engineering, The Northwest Normal University, Lanzhou 730000, China

\* Correspondence: yangbaoping2004@163.com

Figure S1: The Nuclear magnetic resonance spectrum of the PSE-R-BINOL50%

Figure S2: Molecular weight by polymer gel chromatography

Figure S3: The XPS diffraction of PSE-R-BINOL50%

Figure S4: CD spectrum of PSE-R-BINOL50%

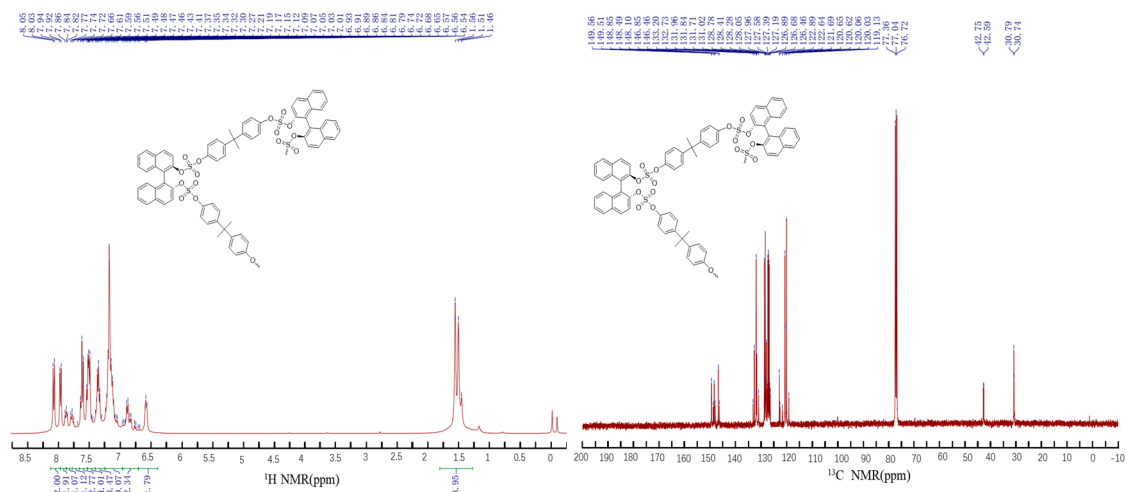

Figure S1 <sup>1</sup>H NMR and <sup>13</sup>C NMR of PSE-R-BINOL50%

| Entry | Materials name | Mn     | Mw     | Mz     | Mv     | PD     |
|-------|----------------|--------|--------|--------|--------|--------|
| 1     | PSE-RBINOL1%   | 33937  | 56602  | 82522  | 53033  | 1.6679 |
| 2     | PSE-RBINOL50%  | 172771 | 318620 | 536904 | 292302 | 1.8442 |
| 3     | PSE-SBINOL50%  | 43648  | 76072  | 118176 | 70643  | 1.7428 |

\* Test method: Dissolve the polymer in THF, prepare a solution with a concentration of 1mg/ml, filter it

through the filter head, and then conduct gel chromatograph measurement, and take THF as the eluent

Figure S2: Molecular weight by polymer gel chromatography

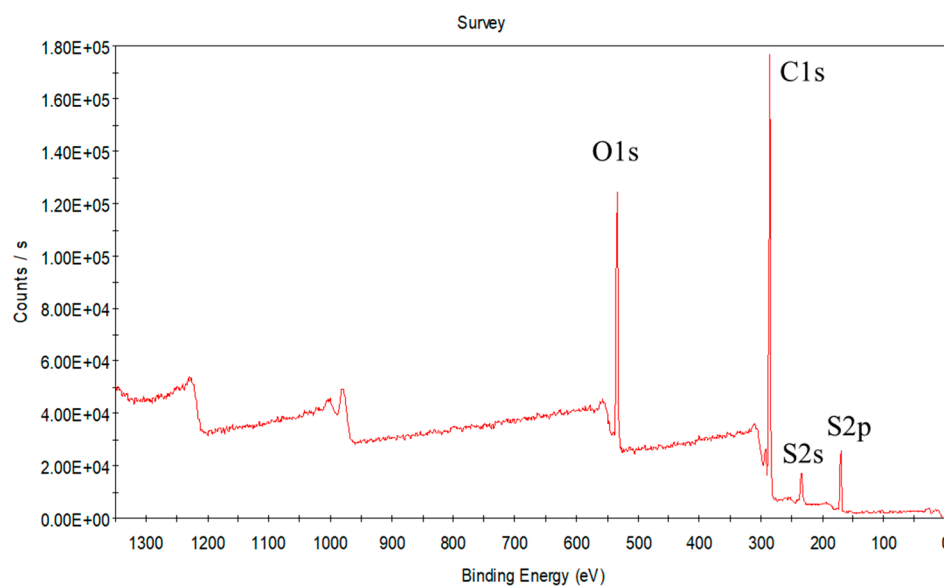

Figure S3 the XPS diffraction of the PSE-R-BINOL50%

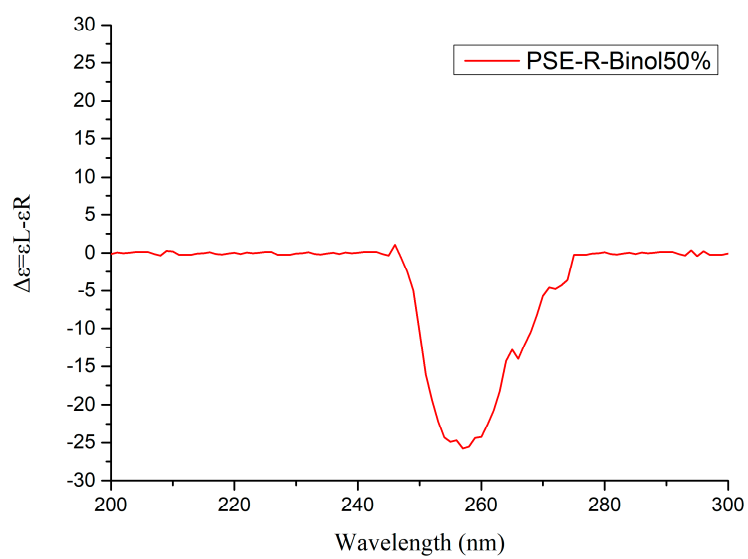

Figure S4 CD spectrum of PSE-R-BINOL50%
